# Supplementary material for: Biofluorescence in Catsharks (Scyliorhinidae): Fundamental Description and Relevance for Elasmobranch Visual Ecology
Source: PubMed Central journal article supplement (PMC4843165; doi:10.1038/srep24751), 2016-04-25
Supplement: srep24751-s1.pdf [file srep24751-s1.pdf]

## Supplementary Table and Figures

### **Biofluorescence in Catsharks (Scyliorhinidae): Fundamental Description and Relevance for Elasmobranch Visual Ecology**

David F. Gruber<sup>1,2\*</sup>, Ellis R. Loew<sup>3</sup>, Dimitri D. Deheyn<sup>4</sup>, Derya Akkaynak<sup>5</sup>, Jean P. Gaffney<sup>1</sup>, W. Leo Smith<sup>6</sup>, Matthew P. Davis<sup>7</sup>, Jennifer H. Stern<sup>6</sup>, Vincent A. Pieribone<sup>8</sup>, John S. Sparks<sup>9</sup>

<sup>1</sup>Baruch College  
City University of New York  
Department of Natural Sciences  
New York, NY 10010, USA

<sup>2</sup>City University of New York  
The Graduate Center  
Program in Biology  
New York, NY 10016, USA

<sup>3</sup>College of Veterinary Medicine  
Cornell University  
Ithaca, NY 14853, USA

<sup>4</sup>University of California, San Diego  
Scripps Institution of Oceanography  
La Jolla, CA 92093, USA

<sup>5</sup>University of Haifa  
Charney School of Marine Sciences  
Haifa, 3498838, Israel  
Interuniversity Institute of Marine Sciences  
Eilat, 88103, Israel

<sup>6</sup>University of Kansas  
Biodiversity Institute and Department of Ecology and Evolutionary Biology  
Lawrence, KS, 66049 USA

<sup>7</sup>St. Cloud State University  
Department of Biological Sciences  
St. Cloud, MN 56301 USA

<sup>8</sup>The John B. Pierce Laboratory  
Cellular and Molecular Physiology  
Yale University School of Medicine  
New Haven, CT 06519, USA

<sup>9</sup>American Museum of Natural History  
Division of Vertebrate Zoology

## Supplementary Information

**Supp. Table 1.** Classification and GenBank accession numbers for species included in phylogenetic analyses.

**Supp. Fig. 1.** *Cephaloscyllium ventriosum* in its natural environment in Scripps Canyon under natural light conditions, with no filter or added light.

**Supp. Fig. 2.** Top) Cross section of *C. ventriosum* showing localization of fluorescent compound in the “lighter” areas of the skin and in basal layer of dermis under white light (top left) and fluorescent light (top right). Bottom) 150X magnification of a single dermal dendrite showing fluorescence at base of dermal dendrite. White light (bottom left), fluorescent light (bottom right).

**Supp. Fig. 3.** Top) Cross section of *S. retifer* showing localization of fluorescent compound in basal layer of dermis.

**Supp. Fig. 4.** Fluorescence exhibited in egg casings of *S. retifer* at different life-stages.

**Supp. Fig. 5.** Species level maximum likelihood phylogeny of elasmobranchs. Numbers at nodes indicate bootstrap support values  $\geq 50\%$ . Asterisks (\*) at nodes indicate bootstrap support values  $\geq 95\%$ . Outgroups marked with dashed lines.

Supplementary Table I. Classification and GenBank accession numbers for species included in phylogenetic analyses.

| TAXON                         | RAG1       | ND2         | COI         |
|-------------------------------|------------|-------------|-------------|
| <b>PETROMYZONTIFORMES</b>     |            |             |             |
| <i>Petromyzon_marinus</i>     | //         | U11880.1    | U11880.1    |
|                               |            |             |             |
| <b>COELACANTHIFORMES</b>      |            |             |             |
| <b>Coelacanthidae</b>         |            |             |             |
| <i>Latimeria_menadoensis</i>  | AY442925.1 | NC_006921.2 | NC_006921.2 |
|                               |            |             |             |
| <b>LEPISOSTEIFORMES</b>       |            |             |             |
| <b>Lepisosteidae</b>          |            |             |             |
| <i>Lepisosteus_osseus</i>     | //         | NC_008104.1 | NC_008104.1 |
|                               |            |             |             |
| <b>CHIMAERIFORMES</b>         |            |             |             |
| <b>Callorhynchidae</b>        |            |             |             |
| <i>Callorhynchus_milii</i>    | //         | HM147137.1  | HM147137.1  |
| <b>Chimaeridae</b>            |            |             |             |
| <i>Chimera_sp</i>             | GUI30744.1 | //          | GUI30671.1  |
| <i>Hydrolagus_colliei</i>     | //         | JQ518720.1  | JQ354134.1  |
| <b>Rhinochimaeridae</b>       |            |             |             |
| <i>Rhinochimaera_pacifica</i> | //         | HM147141.1  | HM147141.1  |
|                               |            |             |             |
| <b>HEXANCHIFORMES</b>         |            |             |             |
| <b>Hexanchidae</b>            |            |             |             |
| <i>Heptranchias_perlo</i>     | //         | KF927891.1  | KF590398.1  |
|                               |            |             |             |
| <b>SQUALIFORMES</b>           |            |             |             |
| <b>Dalatiidae</b>             |            |             |             |
| <i>Squaliolus_aliae</i>       | GUI30748.1 | KF927966.1  | GUI30675.1  |
| <i>Dalatias_lichia</i>        | GUI30749.1 | JQ518951.1  | GUI30676.1  |
| <i>Isistius_brasiliensis</i>  | GUI30817.1 | JQ518953.1  | //          |
| <b>Etmopteridae</b>           |            |             |             |
| <i>Etmopterus_lucifer</i>     | GUI30785.1 | JQ518963.1  | GUI30682.1  |
| <i>Etmopterus_pusillus</i>    | GUI30762.1 | JQ518964.1  | KF899426.1  |
| <i>Trigonognathus_kabeyai</i> | GUI30775.1 | JQ400130.1  | GUI30702.1  |
| <b>Somniosidae</b>            |            |             |             |
| <i>Proscymnodon_plunketi</i>  | GUI30769.1 | KF927991.1  | GUI30696.1  |
| <b>Oxynotidae</b>             |            |             |             |
| <i>Oxynotus_paradoxus</i>     | GUI30747.1 | JQ518966.1  | GUI30674.1  |
| <b>Centrophoridae</b>         |            |             |             |
| <i>Deania_calcea</i>          | GUI30772.1 | JQ519007.1  | DQ108225.1  |
| <i>Centrophorus_squamosus</i> | GUI30774.1 | JQ035655.1  | KF899383.1  |
| <b>Squalidae</b>              |            |             |             |

|                                   |            |            |            |
|-----------------------------------|------------|------------|------------|
| <i>Squalus acanthias</i>          | JN184093.I | JQ035621.I | KC015925.I |
| <b>Echinorhinidae</b>             |            |            |            |
| <i>Echinorhinus brucus</i>        | GUI30818.I | JQ519170.I | HM467790.I |
| <i>Echinorhinus cookei</i>        | //         | JQ519016.I | DQ521002.I |
|                                   |            |            |            |
| <b>PRISTIOPHORIFORMES</b>         |            |            |            |
| <b>Pristiophoridae</b>            |            |            |            |
| <i>Pristiophorus japonicus</i>    | //         | AB721306.I | AB721306.I |
|                                   |            |            |            |
| <b>SQUATINIFORMES</b>             |            |            |            |
| <b>Squatinae</b>                  |            |            |            |
| <i>Squatina nebulosa</i>          | //         | KF927985.I | KM264313.I |
|                                   |            |            |            |
| <b>HETERODONTIFORMES</b>          |            |            |            |
| <b>Heterodontidae</b>             |            |            |            |
| <i>Heterodontus francisci</i>     | JN184089.I | JQ519165.I | FJ519566.I |
|                                   |            |            |            |
| <b>LAMNIFORMES</b>                |            |            |            |
| <b>Odontaspidae</b>               |            |            |            |
| <i>Carcharias taurus</i>          | AF135475   | KF569943.I | KF569943.I |
| <b>Mitsukurinidae</b>             |            |            |            |
| <i>Mitsukurina owstoni</i>        | JN184090.I | EU528659.I | EU528659.I |
| <b>Pseudocarchariidae</b>         |            |            |            |
| <i>Pseudocarcharias kamoharai</i> | AF135479.I | KM575726.I | KM575726.I |
| <b>Lamnidae</b>                   |            |            |            |
| <i>Lamna ditropis</i>             | AF135478.I | JQ518735.I | KF918878.I |
| <i>Isurus oxyrinchus</i>          | AF135480.I | JQ518734.I | KF590330.I |
| <b>Megachasmidae</b>              |            |            |            |
| <i>Megachasma pelagios</i>        | AF135483.I | KC702506.I | KC702506.I |
| <b>Cetorhinidae</b>               |            |            |            |
| <i>Cetorhinus maximus</i>         | AY462147.I | KF597303.I | KF597303.I |
| <b>Alopiidae</b>                  |            |            |            |
| <i>Alopias pelagicus</i>          | AF135473   | KF412639.I | KF412639.I |
|                                   |            |            |            |
| <b>ORECTOLOBIFORMES</b>           |            |            |            |
| <b>Rhincodontidae</b>             |            |            |            |
| <i>Rhincodon typus</i>            | //         | KC633221.I | KC633221.I |
| <b>Parascylliidae</b>             |            |            |            |
| <i>Parascyllium collare</i>       | //         | JQ518749.I | //         |
| <b>Brachaeluridae</b>             |            |            |            |
| <i>Brachaelurus colcloughi</i>    | //         | JQ519055.I | //         |
| <b>Orectolobidae</b>              |            |            |            |

|                                   |            |             |             |
|-----------------------------------|------------|-------------|-------------|
| <i>Orectolobus japonicus</i>      | //         | KF111729.I  | KF111729.I  |
| <b>Hemiscyllidae</b>              |            |             |             |
| <i>Chiloscyllium punctatum</i>    | //         | JQ082337.I  | JQ082337.I  |
| <b>Ginglymostomatidae</b>         |            |             |             |
| <i>Ginglymostoma cirratum</i>     | AY949032.I | JQ518741.I  | //          |
| <i>Nebrius ferrugineus</i>        | //         | JQ518742.I  | KF899636.I  |
|                                   |            |             |             |
| <b>CARCHARHINIFORMES</b>          |            |             |             |
| <b>Pentanchidae</b>               |            |             |             |
| <i>Apristurus melanoasper</i>     | AY462161.I | JQ519193.I  | EU398537.I  |
| <b>Scyliorhinidae</b>             |            |             |             |
| <i>Cephaloscyllium ventriosum</i> | //         | JQ519118.I  | GU440268.I  |
| <i>Scyliorhinus retifer</i>       | //         | JQ519117.I  | KT075309.I  |
| <i>Scyliorhinus canicula</i>      | JN184092.I | NC_001950.I | NC_001950.I |
| <b>Proscylliidae</b>              |            |             |             |
| <i>Proscyllium habereri</i>       | AY462184.I | KF927940.I  | JQ681382.I  |
| <b>Pseudotriakidae</b>            |            |             |             |
| <i>Pseudotriakis microdon</i>     | AY462185.I | AB560493.I  | AB560493.I  |
| <b>Leptochariidae</b>             |            |             |             |
| <i>Leptocharias smithii</i>       | //         | JQ518660.I  | //          |
| <b>Triakidae</b>                  |            |             |             |
| <i>Mustelus asterias</i>          | AY462188.I | JQ518705.I  | KJ709832.I  |
| <b>Hemigaleidae</b>               |            |             |             |
| <i>Hemipristis elongata</i>       | //         | JQ519069.I  | KPI93382.I  |
| <b>Carcharhinidae</b>             |            |             |             |
| <i>Carcharhinus acronotus</i>     | //         | GU385350.I  | KF461148.I  |
| <i>Eusphyrina blochii</i>         | //         | DQ422104.I  | EU398784.I  |
| <b>Sphyrnidae</b>                 |            |             |             |
| <i>Sphyrna lewini</i>             | JQ929571.I | JQ519063.I  | KF009669.I  |
|                                   |            |             |             |
| <b>RAJIFORMES</b>                 |            |             |             |
| <b>Rajidae</b>                    |            |             |             |
| <i>Leucoraja naevus</i>           | JN184231.I | JN184280.I  | KP975730.I  |
| <i>Okamejei hollandi</i>          | //         | JQ519059.I  | JQ681338.I  |
|                                   |            |             |             |
| <b>PLATYRHINIFORMES</b>           |            |             |             |
| <b>Platyrrhinidae</b>             |            |             |             |
| <i>Platyrrhina sinensis</i>       | JN184111.I | JN184068.I  | HM180795.I  |
| <i>Platyrrhinoidis triseriata</i> | JN184112.I | JQ518853.I  | GU440463.I  |
|                                   |            |             |             |
| <b>TORPEDINIFORMES</b>            |            |             |             |
| <b>Narcinidae</b>                 |            |             |             |

|                                |            |            |            |
|--------------------------------|------------|------------|------------|
| <i>Narcine_tasmaniensis</i>    | JN184094.I | JN171594.I | JN171594.I |
| <b>Torpedinidae</b>            |            |            |            |
| <i>Torpedo_macneilli</i>       | JN184095.I | JQ518927.I | EU399058.I |
|                                |            |            |            |
| <b>TRYGONORRHINIFORMES</b>     |            |            |            |
| <b>Trygonorrhinidae</b>        |            |            |            |
| <i>Trygonorrhina_fasciata</i>  | JN184102.I | JQ519027.I | EU399098.I |
| <i>Zapteryx_exasperata</i>     | JN184103.I | KC610081.I | JN184087.I |
|                                |            |            |            |
| <b>RHINOBATIFORMES</b>         |            |            |            |
| <b>Rhinobatidae</b>            |            |            |            |
| <i>Anoxypristis_cuspidata</i>  | JN184212.I | JN184261.I | KF590517.I |
| <i>Pristis_clavata</i>         | JN184097.I | JQ519150.I | EU398988.I |
| <i>Rhinobatos_glaucostigma</i> | JN184100.I | JQ518911.I | JN184075.I |
| <i>Glaucostegus_thouin</i>     | JN184215.I | JN184264.I | KF899441.I |
| <i>Glaucostegus_typus</i>      | JN184098.I | JQ519057.I | EU398998.I |
|                                |            |            |            |
| <b>Zanobatidae</b>             |            |            |            |
| <i>Zanobatus_schoenleinii</i>  | JN184113.I | JQ518943.I | //         |
| <b>Hexatrygonidae</b>          |            |            |            |
| <i>Hexatrygon_bickelli</i>     | JN184120.I | JQ518835.I | JN184061.I |
| <b>Plesiobatidae</b>           |            |            |            |
| <i>Plesiobatis_daviesi</i>     | JN184125.I | KF927935.I | EU398978.I |
| <b>Dasyatidae</b>              |            |            |            |
| <i>Pastinachus_atrus</i>       | KC249808.I | JN184290.I | KM072988.I |
| <i>Urogymnus_asperrimus</i>    | KC249812.I | JQ519107.I | KC250636.I |
| <i>Himantura_walga</i>         | KC249807.I | JN184308.I | KM072995.I |
| <i>Himantura_leoparda</i>      | //         | KM073045.I | JX263418.I |
| <b>Gymnuridae</b>              |            |            |            |
| <i>Gymnura_crebripunctata</i>  | JN184119.I | JQ518827.I | JN184060.I |
| <i>Gymnura_micrura</i>         | JN184244.I | JN184295.I | GU225294.I |
| <i>Aetoplatea_zonura</i>       | JN184243.I | JN184294.I | EU398805.I |
| <b>Myliobatidae</b>            |            |            |            |
| <i>Mobula_thurstoni</i>        | KM364956.I | KM396925.I | KM073012.I |
| <b>Urolophidae</b>             |            |            |            |
| <i>Urolophus_cruciatus</i>     | JN184129.I | JQ518937.I | DQ108152.I |
| <b>Potamotrygonidae</b>        |            |            |            |
| <i>Taeniura_lymma</i>          | KC249810.I | KM073038.I | KC250633.I |
| <b>Urotrygonidae</b>           |            |            |            |
| <i>Urobatis_jamaicensis</i>    | //         | JQ518941.I | GU225505.I |



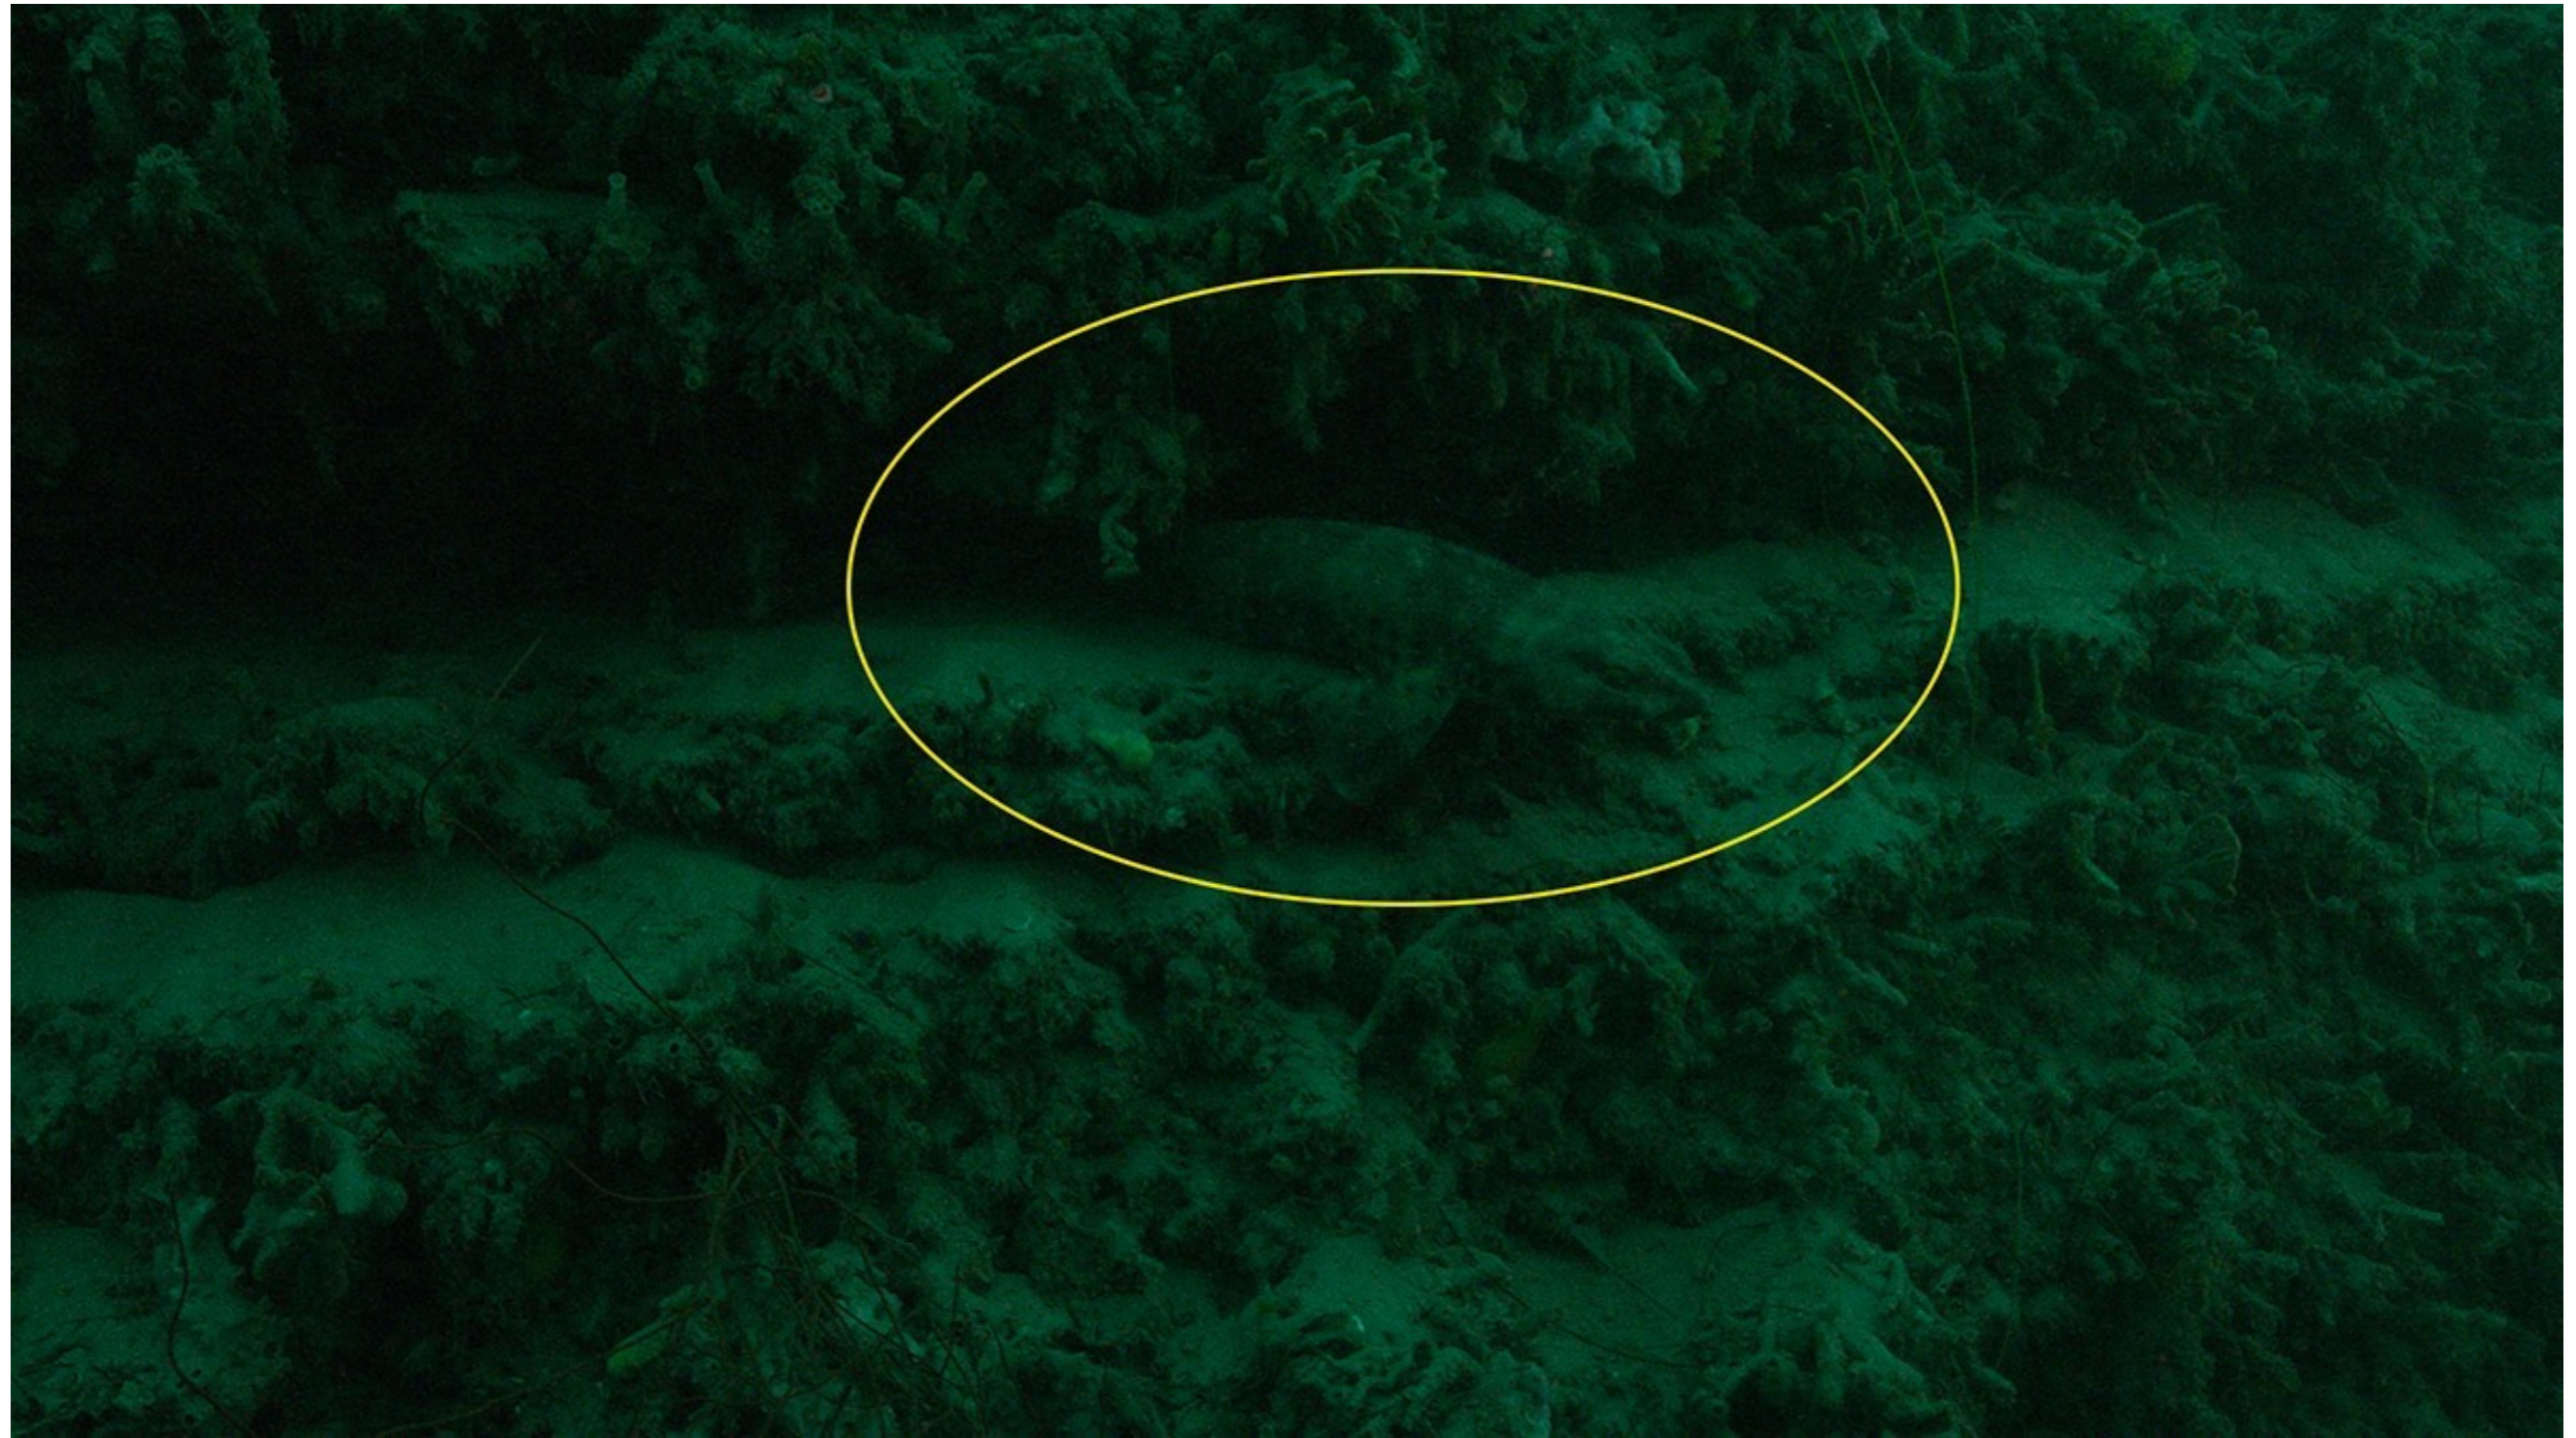

Supp. Fig. 1.



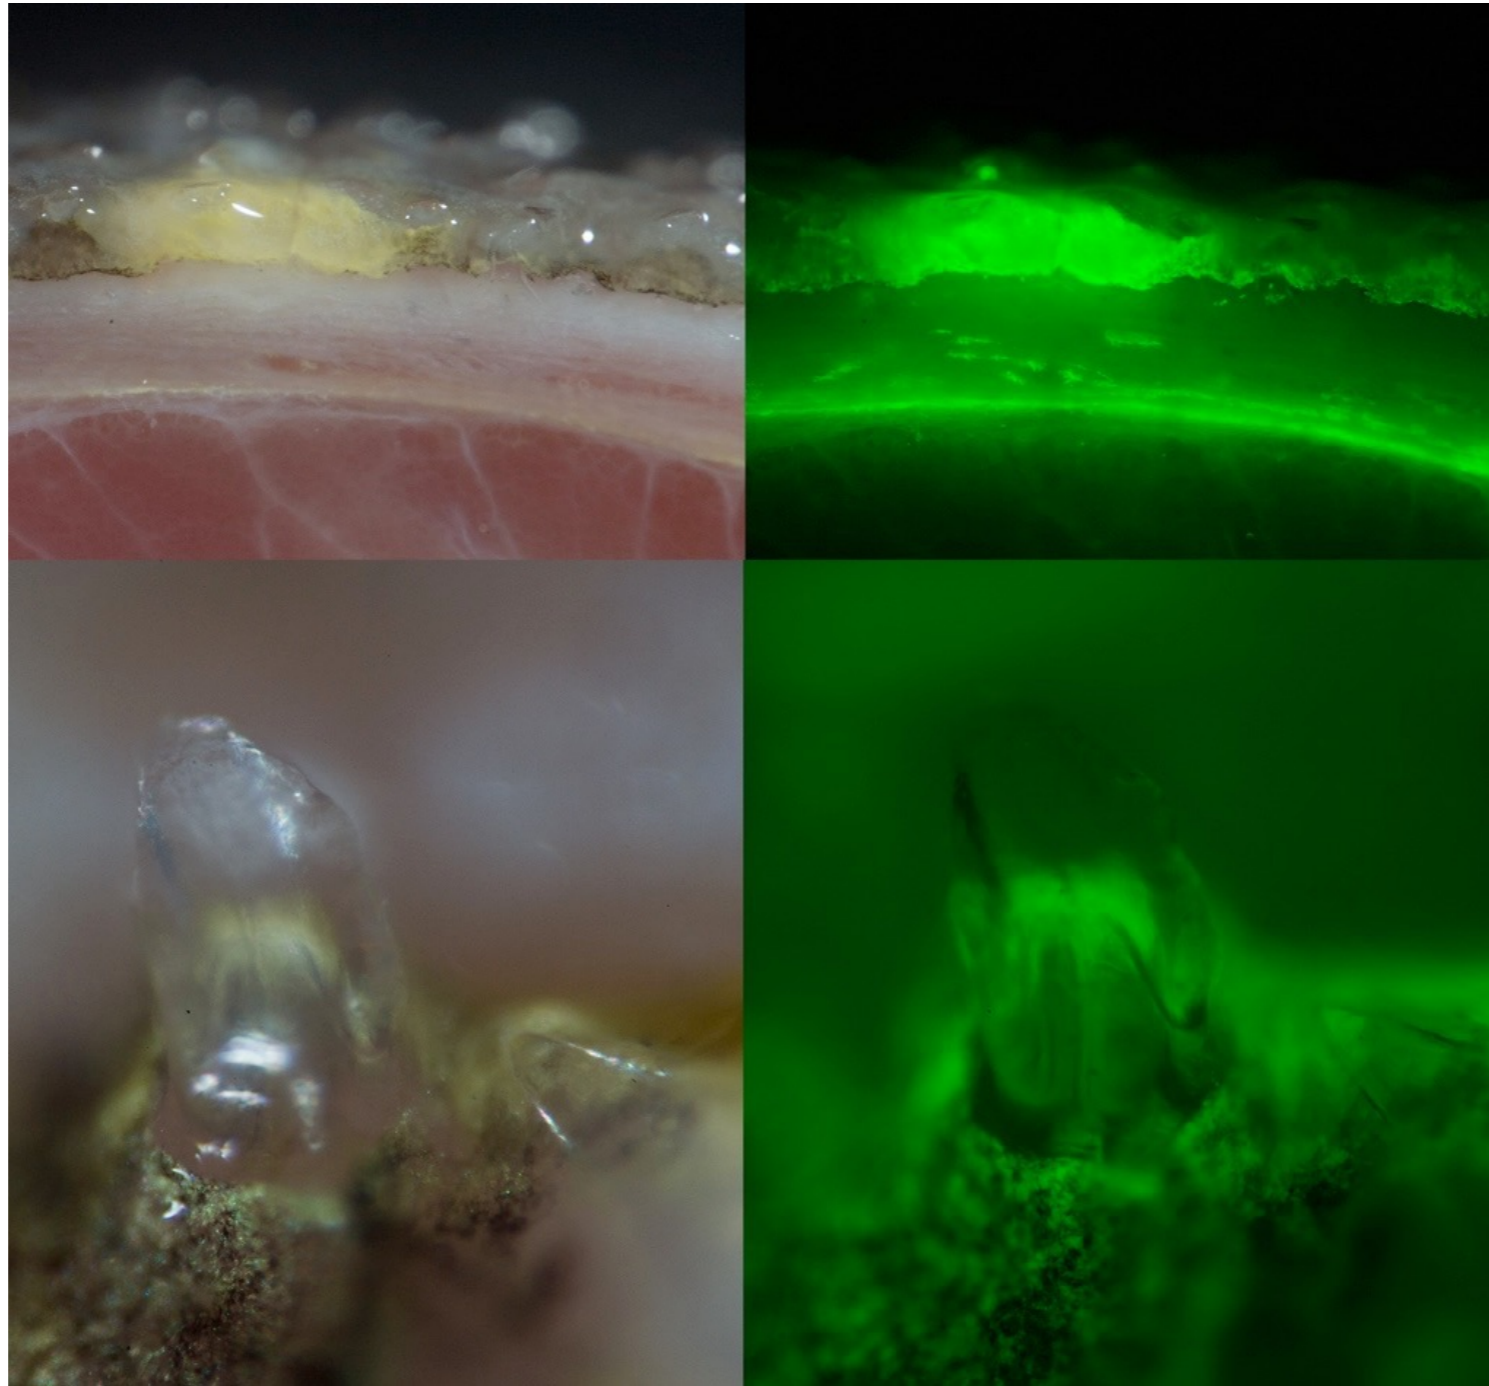

Supp. Fig. 2.



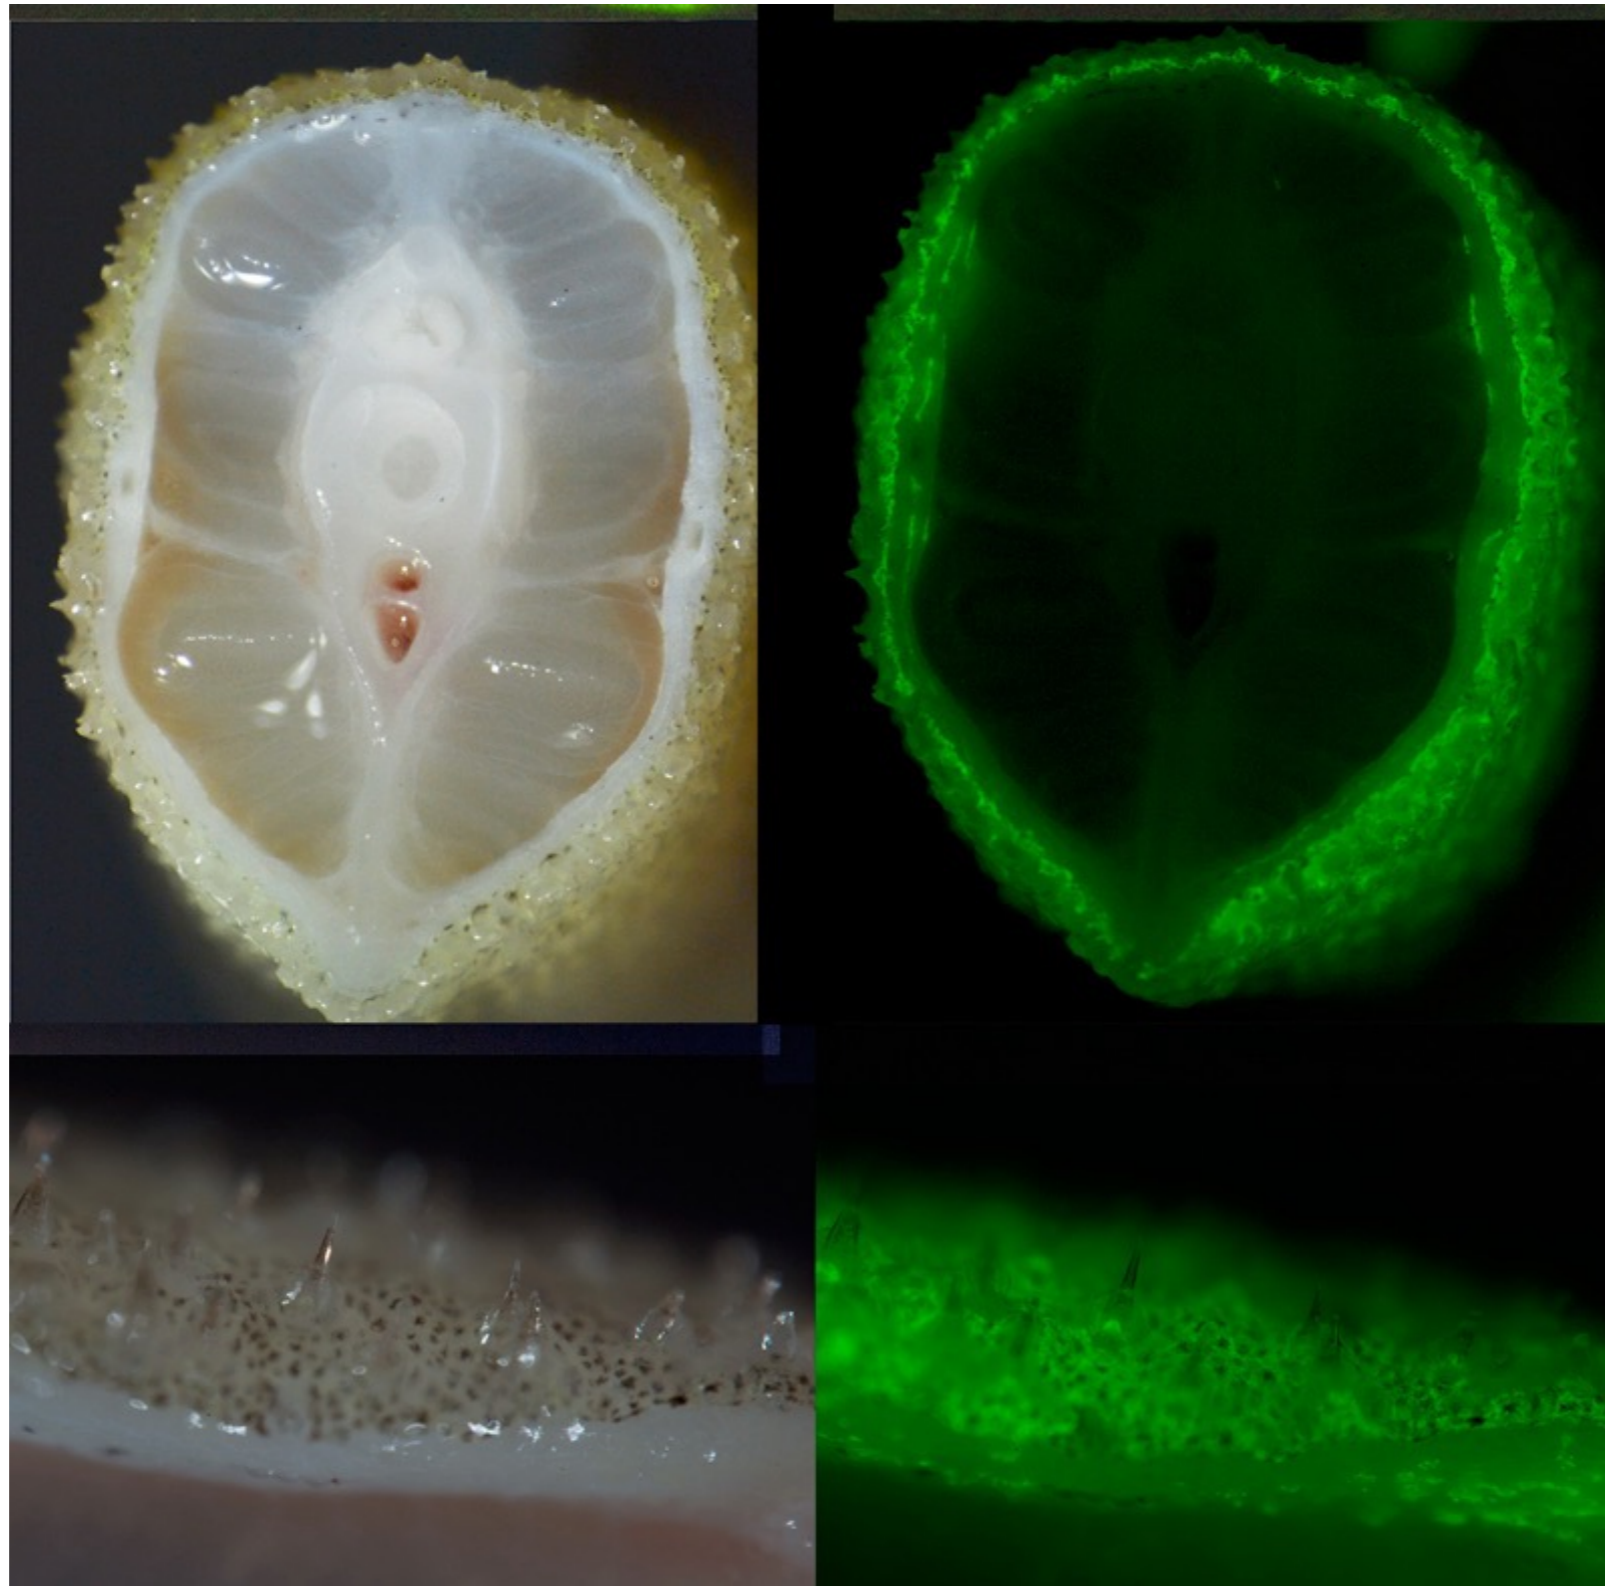

Supp. Fig. 3.

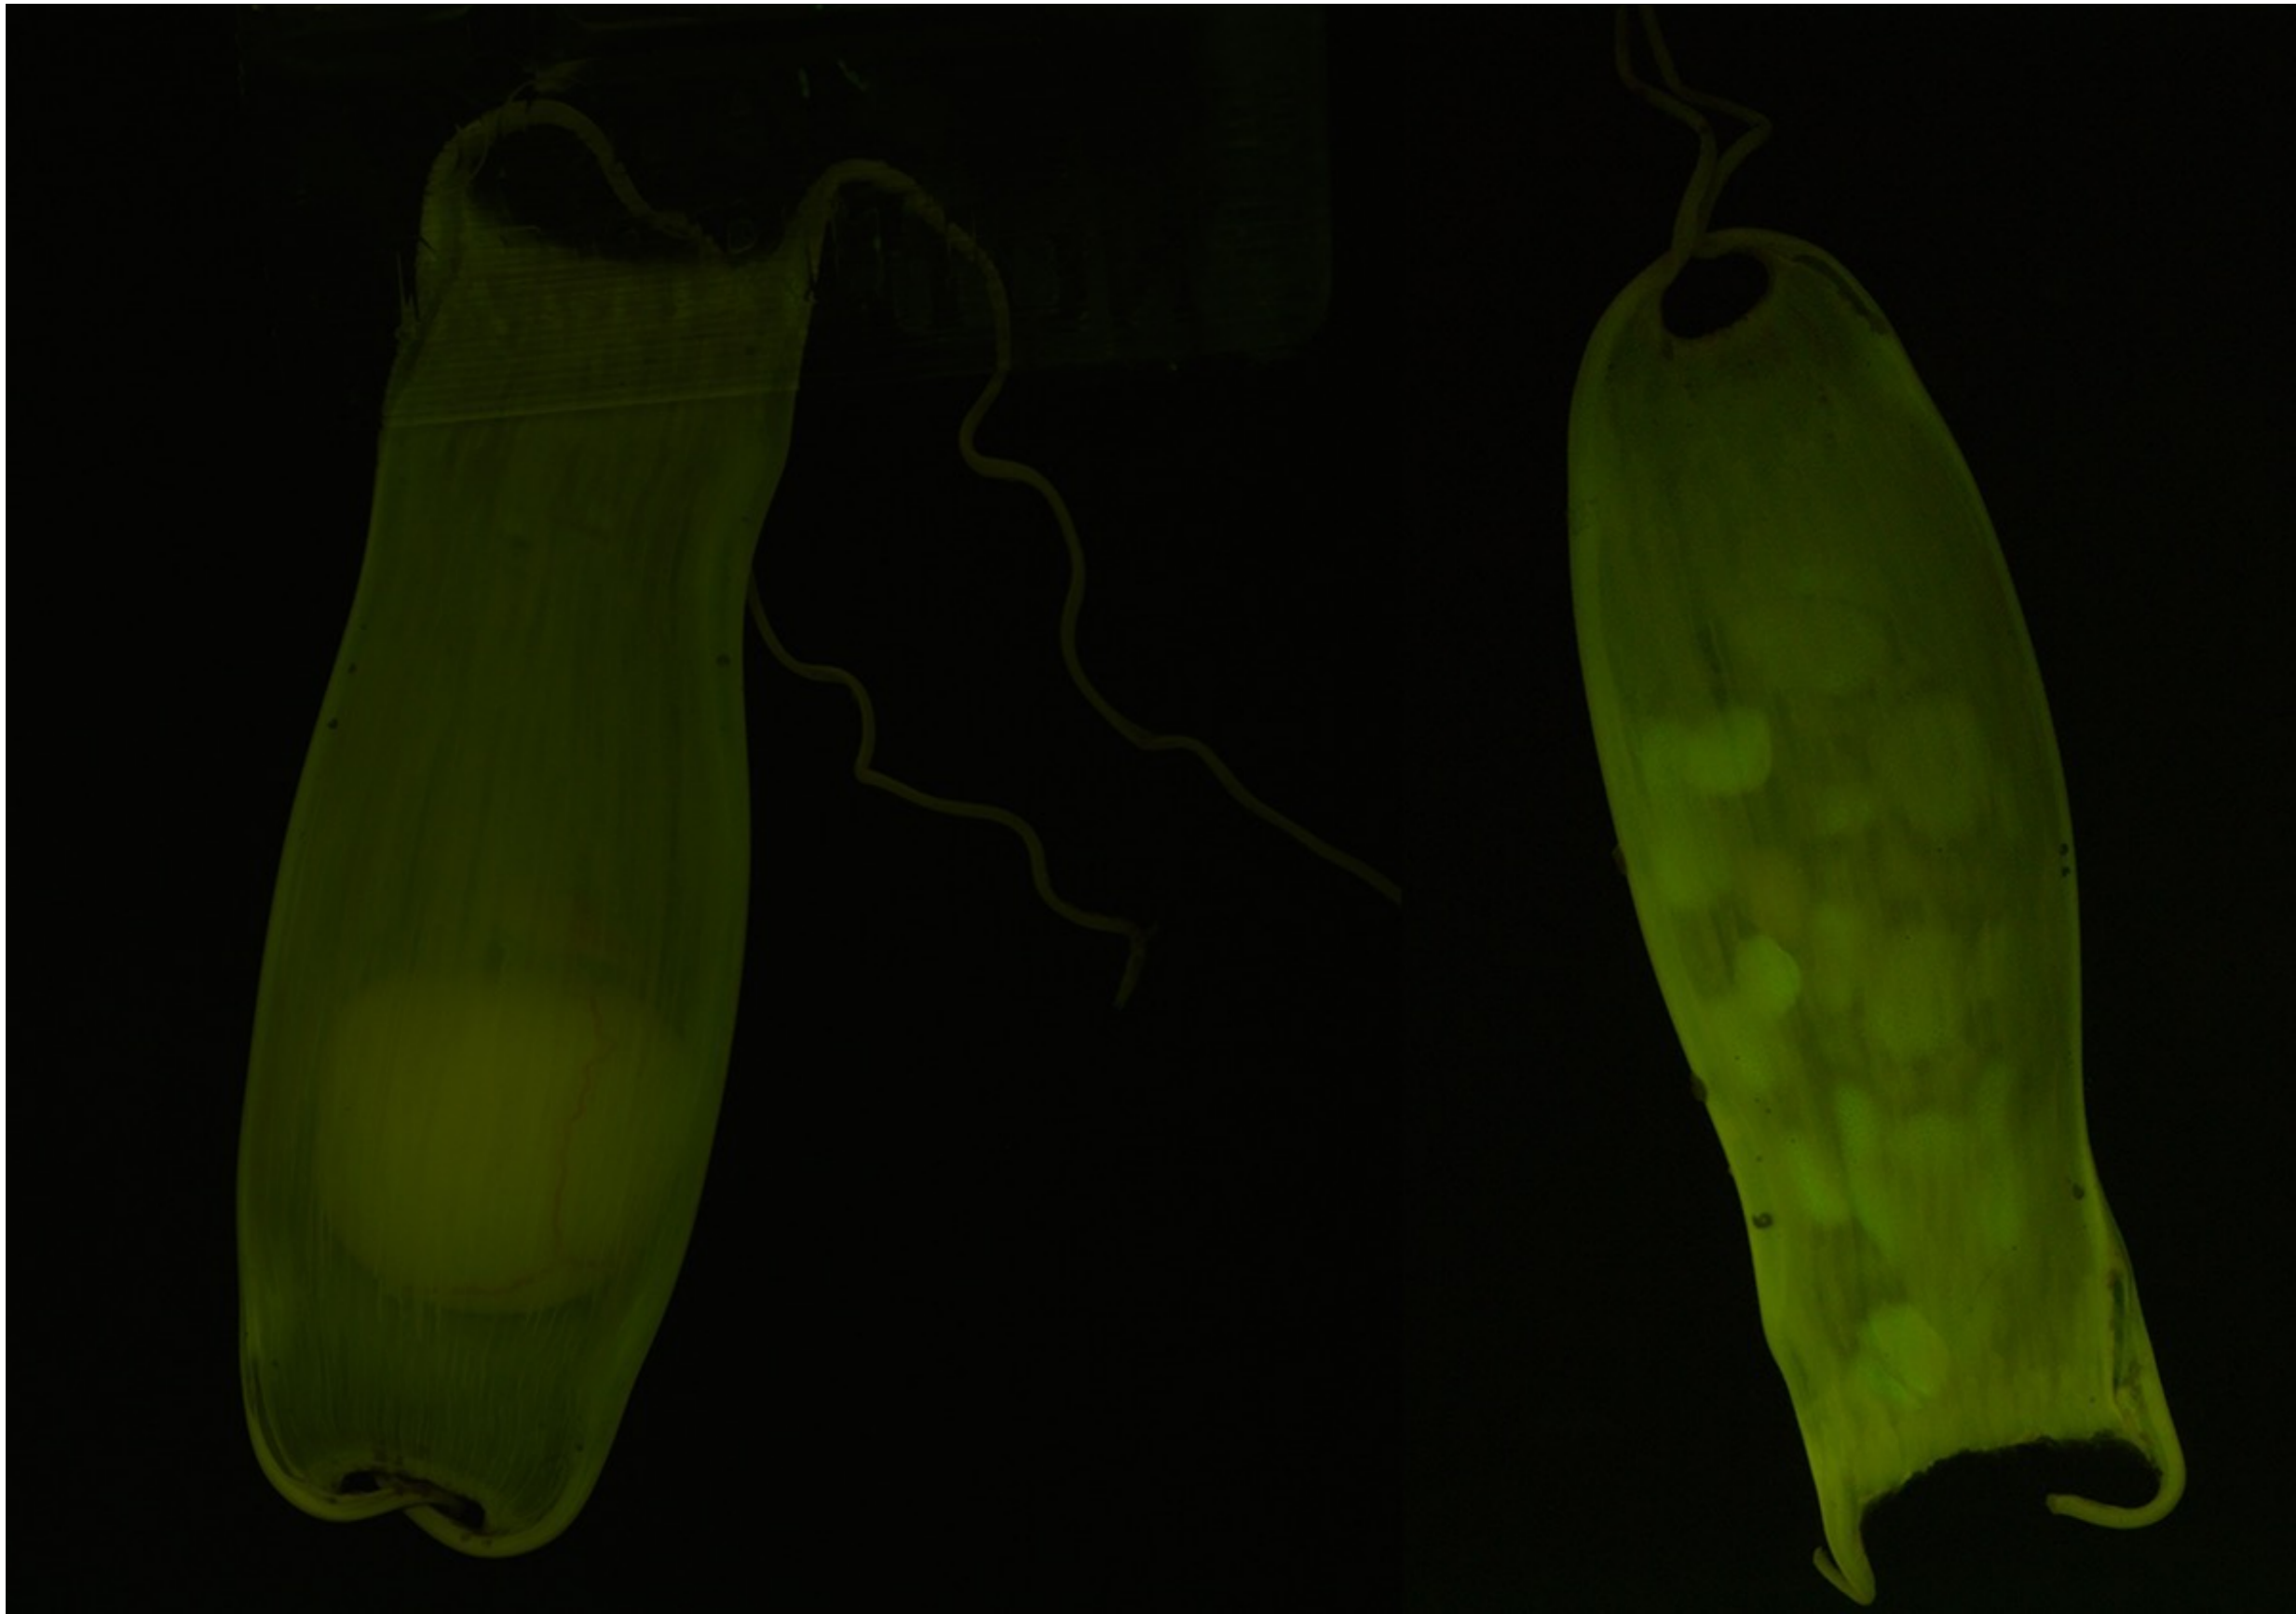

Supp. Fig. 4.

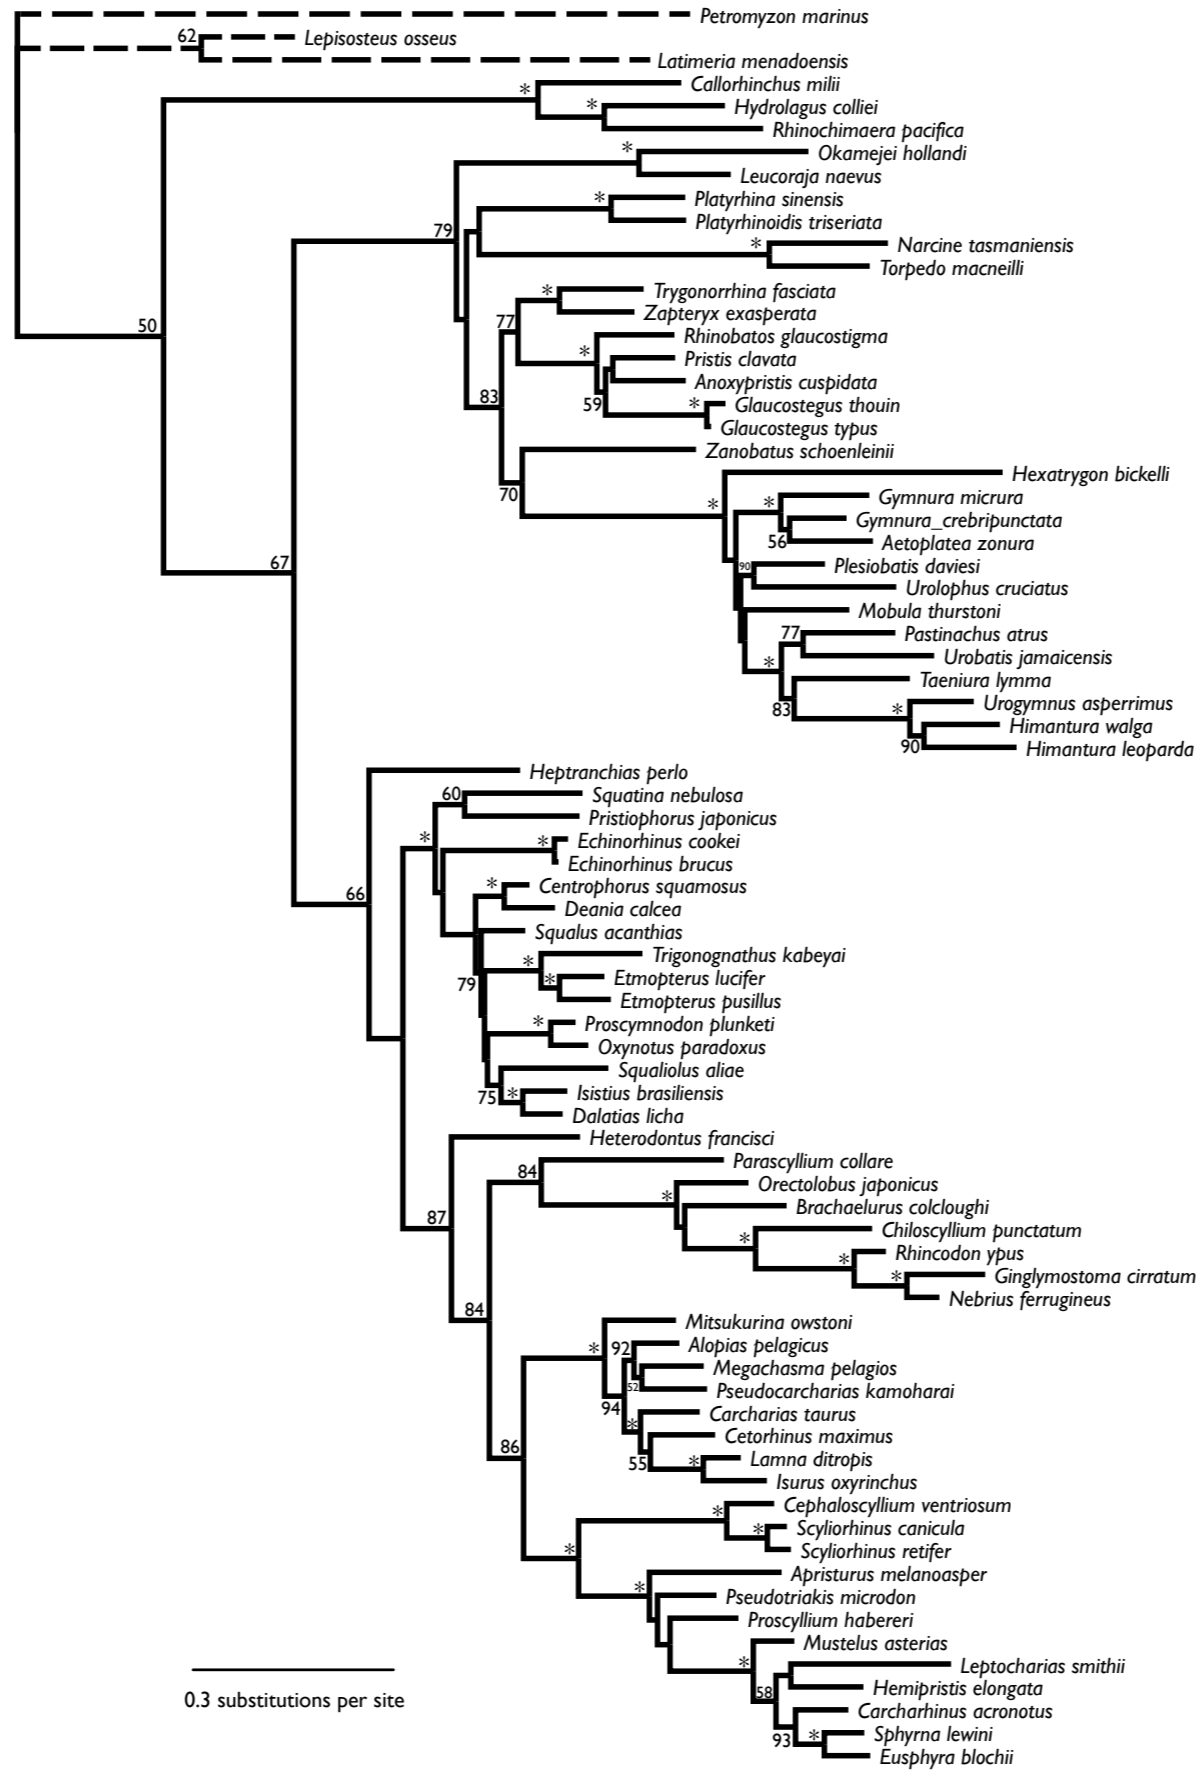

Supp. Fig. 5.
